# Supplementary material for: The leucine-rich repeat domains of BK channel auxiliary γ subunits regulate their expression, trafficking, and channel-modulation functions
Source: PubMed Central journal article supplement (PMC8892010; doi:10.1016/j.jbc.2022.101664), 2022-01-30

## Supporting Information

The leucine-rich repeat domains of BK channel auxiliary  $\gamma$  subunits regulate their expression, trafficking, and channel-modulation functions

Guanxing Chen<sup>1</sup>, Qin Li<sup>1</sup>, Jiusheng Yan<sup>1,2</sup>

<sup>1</sup>Department of Anesthesiology and Perioperative Medicine, The University of Texas MD Anderson Cancer Center, Houston, Texas, USA

<sup>2</sup>Neuroscience and Biochemistry and Cell Biology, The University of Texas MD Anderson Cancer Center UT Health Graduate School of Biomedical Sciences, Houston, Texas, USA

Correspondence and requests for materials should be addressed to J.Y. ([jyan1@mdanderson.org](mailto:jyan1@mdanderson.org)).

**Table S1** Boltzmann-fit parameters of the voltage-dependent BK channel activation in the presence of auxiliary  $\gamma$  subunit wild-types and mutants.

| Expression                                 | Boltzmann fit parameters            |                              |     |
|--------------------------------------------|-------------------------------------|------------------------------|-----|
|                                            | $V_{1/2}$ (mV)                      | $z$                          | $n$ |
| BK $\alpha$ alone                          | 167.7 $\pm$ 2.3                     | 1.24 $\pm$ 0.05              | 11  |
| + $\gamma$ 1                               | 22.5 $\pm$ 2.7                      | 1.68 $\pm$ 0.07              | 10  |
| + $\gamma$ 2                               | 61.4 $\pm$ 3.0                      | 1.22 $\pm$ 0.07              | 9   |
| + $\gamma$ 3                               | 115.0 $\pm$ 1.7                     | 1.36 $\pm$ 0.05              | 6   |
| + $\gamma$ 1 + tunicamycin                 | 21.8 $\pm$ 4.9 (27%) <sup>a,b</sup> | 1.53 $\pm$ 0.13 <sup>b</sup> | 11  |
|                                            | 154.0 $\pm$ 3.4 (73%)               | 1.16 $\pm$ 0.09              |     |
| + $\gamma$ 1 (N147Q)                       | 18.8 $\pm$ 5.8 (32%) <sup>b</sup>   | 1.53 $\pm$ 0.14 <sup>b</sup> | 11  |
|                                            | 159.8 $\pm$ 5.1 (68%)               | 0.90 $\pm$ 0.07              |     |
| + $\gamma$ 1 (N147Q) overexpression        | 10.0 $\pm$ 5.4 (79%)                | 1.57 $\pm$ 0.16              | 8   |
| + $\gamma$ 2 + tunicamycin                 | 169.2 $\pm$ 6.3 <sup>b</sup>        | 1.25 $\pm$ 0.09 <sup>b</sup> | 7   |
| + $\gamma$ 2 (N112Q)                       | 58.4 $\pm$ 1.5 (79%)                | 1.30 $\pm$ 0.08              | 9   |
|                                            | 167 (21%) <sup>b</sup>              | 1.16 $\pm$ 0.24 <sup>b</sup> |     |
| + $\gamma$ 2 (N148Q)                       | 50.7 $\pm$ 3.5 (45%)                | 1.30 $\pm$ 0.12              | 6   |
|                                            | 155.0 $\pm$ 4.2 (55%)               | 0.95 $\pm$ 0.12              |     |
| + $\gamma$ 2 (N211Q)                       | 75 $\pm$ 21 (49%)                   | 1.10 $\pm$ 0.13              | 8   |
|                                            | 150 $\pm$ 34 (51%)                  | 1.08 $\pm$ 0.87              |     |
| + $\gamma$ 2 (N112/148Q)                   | 87 $\pm$ 33 (23%) <sup>b</sup>      | 1.00 $\pm$ 0.29 <sup>b</sup> | 6   |
|                                            | 157 $\pm$ 11 (77%)                  | 1.00 $\pm$ 0.23              |     |
| + $\gamma$ 2 (N112/211Q)                   | 74 $\pm$ 23 (23%) <sup>b</sup>      | 1.06 $\pm$ 0.28 <sup>b</sup> | 12  |
|                                            | 150 $\pm$ 8 (77%)                   | 1.00 $\pm$ 0.15              |     |
| + $\gamma$ 2 (N148/211Q)                   | 48 $\pm$ 5 (69%)                    | 1.27 $\pm$ 0.14              | 7   |
|                                            | 150 $\pm$ 14 (31%) <sup>b</sup>     | 0.96 $\pm$ 0.50 <sup>b</sup> |     |
| + $\gamma$ 2 (N112/148/211Q)               | 162.4 $\pm$ 4.3                     | 1.31 $\pm$ 0.04              | 7   |
| + $\gamma$ 2(N112/148/211Q) overexpression | 58.6 $\pm$ 5.7 (36%)                | 1.18 $\pm$ 0.02              | 7   |
|                                            | 160 $\pm$ 4 (64%)                   | 1.00 $\pm$ 0.08              |     |
| + $\gamma$ 3 + tunicamycin                 | 160.12 $\pm$ 7.38                   | 1.45 $\pm$ 0.08              | 5   |

|                                           |           |           |   |
|-------------------------------------------|-----------|-----------|---|
| + $\gamma$ 3(N82Q)                        | 167.2±2.1 | 1.21±0.04 | 6 |
| + $\gamma$ 3(N111Q)                       | 168.4±3.3 | 1.26±0.07 | 4 |
| + $\gamma$ 3(N137Q)                       | 149.7±3.8 | 1.07±0.04 | 5 |
| + $\gamma$ 3(N82/111Q)                    | 172.7±2.1 | 1.40±0.08 | 6 |
| + $\gamma$ 3(N82/137Q)                    | 155.3±3.8 | 1.65±0.22 | 5 |
| + $\gamma$ 3(N82Q) overexpression         | 148.6±7.1 | 1.42±0.09 | 9 |
| + $\gamma$ 3(N111Q) overexpression        | 149.2±5.2 | 1.24±0.04 | 8 |
| + $\gamma$ 3(N82Q/N111Q) overexpression   | 127.0±1.4 | 1.68±0.07 | 3 |
| + $\gamma$ 1( $\gamma$ 3LRRD-N82Q)        | 179.3±0.7 | 1.13±0.02 | 4 |
| + $\gamma$ 1( $\gamma$ 3LRRD-N137Q)       | 26.0±1.7  | 1.16±0.15 | 3 |
| + $\gamma$ 1( $\gamma$ 3LRRD-N82Q/N111Q)  | 173.0±2.5 | 1.31±0.15 | 4 |
| + $\gamma$ 1( $\gamma$ 3LRRD-N111Q/N137Q) | 147.3±7.5 | 1.14±0.02 | 4 |

---

n values are the number of recorded excised inside-out patches from different HEK-293 cells.

<sup>a</sup> The indicated percentage in parentheses here and elsewhere refers to the portion of the channels' subpopulation that was obtained from a double Boltzmann function fit.

<sup>b</sup> Because of the difficulty in obtaining reliable parameter values from a double Boltzmann function fit for the minor portion (e.g.,  $\leq 35\%$ ), the estimated values of the  $V_{1/2}$  and errors provided here are considered less reliable and used for references only.

**Table S2** Double- or triple-Boltzmann global fit parameters of the voltage-dependent BK channel activation in the presence of auxiliary  $\gamma$  subunit wild-types and chimeric constructs.

| <b>+ <math>\gamma</math>1</b> |                                   |      |          |
|-------------------------------|-----------------------------------|------|----------|
|                               | <b>Double-Boltzmann (Fig. 3B)</b> |      | <b>n</b> |
| <b>V<sub>1/2</sub> (mV)</b>   | 171                               | 31   |          |
| <b>z (e)</b>                  | 1.04                              | 1.23 |          |
| <b>Fraction</b>               | 1                                 | 0    | 11       |
|                               | 0.85                              | 0.15 | 1        |
|                               | 0.72                              | 0.28 | 1        |
|                               | 0.65                              | 0.35 | 1        |
|                               | 0.45                              | 0.55 | 1        |
|                               | 0.34                              | 0.66 | 1        |
|                               | 0.21                              | 0.79 | 1        |
|                               | 0.14                              | 0.86 | 1        |
|                               | 0                                 | 1    | 10       |

| <b>+ <math>\beta</math>1<sub>(2-155)</sub>-<math>\gamma</math>1<sub>(258-298)</sub></b> |                                                     |      |                                                    |      |      |          |
|-----------------------------------------------------------------------------------------|-----------------------------------------------------|------|----------------------------------------------------|------|------|----------|
|                                                                                         | <b>Double-Boltzmann<br/>(Fig. 3C, middle panel)</b> |      | <b>Triple-Boltzmann<br/>(Fig. 3C, right panel)</b> |      |      | <b>n</b> |
| <b>V<sub>1/2</sub> (mV)</b>                                                             | 97                                                  | 24   | 166                                                | 78   | 14   |          |
| <b>z (e)</b>                                                                            | 0.81                                                | 1.05 | 1.23                                               | 0.94 | 1.17 |          |
| <b>Fraction</b>                                                                         |                                                     |      | 1                                                  | 0    | 0    | 11       |
|                                                                                         | 1                                                   | 0    | 0.28                                               | 0.70 | 0.02 | 5        |
|                                                                                         | 0.87                                                | 0.13 | 0.12                                               | 0.87 | 0.01 | 5        |
|                                                                                         | 0.61                                                | 0.39 | 0.01                                               | 0.80 | 0.19 | 3        |
|                                                                                         | 0.37                                                | 0.63 | 0.01                                               | 0.53 | 0.46 | 3        |
|                                                                                         | 0                                                   | 1    | 0                                                  | 0.15 | 0.85 | 4        |

| <b>+ FAP<math>\alpha</math>2-<math>\gamma</math>1<sub>(258-334)</sub></b> |                                                           |      |                                                          |      |      |          |
|---------------------------------------------------------------------------|-----------------------------------------------------------|------|----------------------------------------------------------|------|------|----------|
|                                                                           | <b>Double-Boltzmann</b><br><b>(Fig. 3D, middle panel)</b> |      | <b>Triple-Boltzmann</b><br><b>(Fig. 3D, right panel)</b> |      |      |          |
| <b>V<sub>1/2</sub> (mV)</b>                                               | 135                                                       | 40   | 168                                                      | 99   | 29   |          |
| <b>z (e)</b>                                                              | 0.92                                                      | 1.20 | 1.24                                                     | 1.33 | 1.52 | <b>n</b> |
| <b>Fraction</b>                                                           |                                                           |      | 0.98                                                     | 0.02 | 0    | 11       |
| (each fit)                                                                | 1                                                         | 0    | 0.60                                                     | 0.40 | 0    | 5        |
|                                                                           | 0.74                                                      | 0.26 | 0.40                                                     | 0.39 | 0.21 | 5        |
|                                                                           | 0.61                                                      | 0.39 | 0.14                                                     | 0.69 | 0.17 | 1        |
|                                                                           | 0.37                                                      | 0.63 | 0.14                                                     | 0.38 | 0.48 | 1        |
|                                                                           | 0.26                                                      | 0.74 | 0.09                                                     | 0.32 | 0.59 | 1        |
|                                                                           | 0.12                                                      | 0.88 | 0                                                        | 0.31 | 0.69 | 1        |
|                                                                           | 0                                                         | 1    | 0                                                        | 0.12 | 0.88 | 1        |

**Figure S1. Protein sequence alignment and domain/region assignment.** Potential *N*-glycosylation sites of Asn residues are shown in red. Cysteine residues that are involved in the formation of disulfide bridges are shown in bold. Hydrophobic residues of Leu, Ile, Val, Phe, Tyr, and Trp are grouped together.

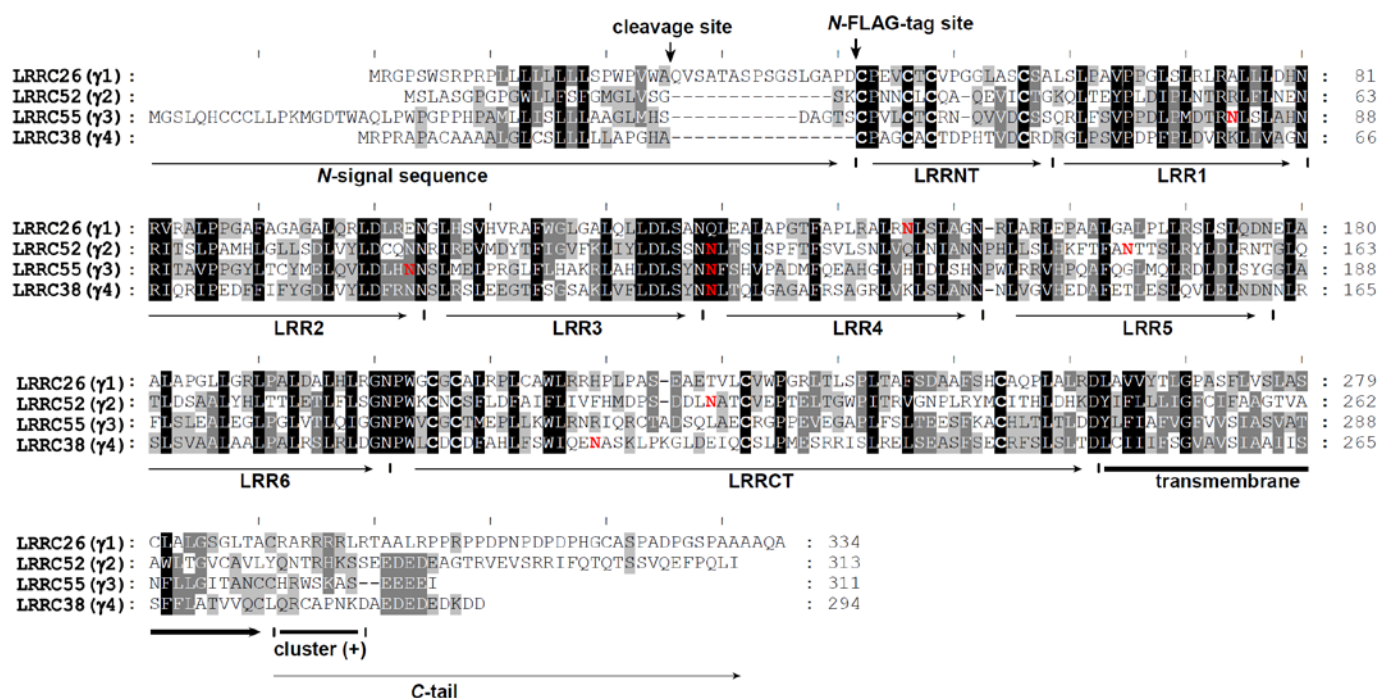

Supplement: mmc1.pdf [file mmc1.pdf]
